# Supplementary material for: Hydrogenated MoS2 QD-TiO2 heterojunction mediated efficient solar hydrogen production
Source: Royal Society of Chemistry journal article supplement (doi:10.1039/c7nr06526d), 2017-01-01
Supplement: c7nr06526d1.pdf [file c7nr06526d1.pdf]

## Electronic Supplementary Information (ESI)

### Hydrogenated MoS<sub>2</sub> QDs- TiO<sub>2</sub> Heterojunction Mediated Efficient Solar Hydrogen Production

Arka Saha<sup>a</sup>, Apurba Sinhamahapatra<sup>b</sup>, Tong-Hyun Kang<sup>b</sup>, Subhash C. Ghosh<sup>a</sup>, Jong-Sung Yu<sup>b, \*</sup>, and Asit B. Panda<sup>a, \*</sup>

<sup>a</sup> Discipline of Inorganic Materials and Catalysis and AcSIR, CSIR-Central Salt and Marine Chemicals Research Institute, G.B. Marg, Bhavnagar-364002, Gujarat, India.

<sup>b</sup> Department of Energy Systems Engineering, DGIST, Daegu, 42988, Republic of Korea

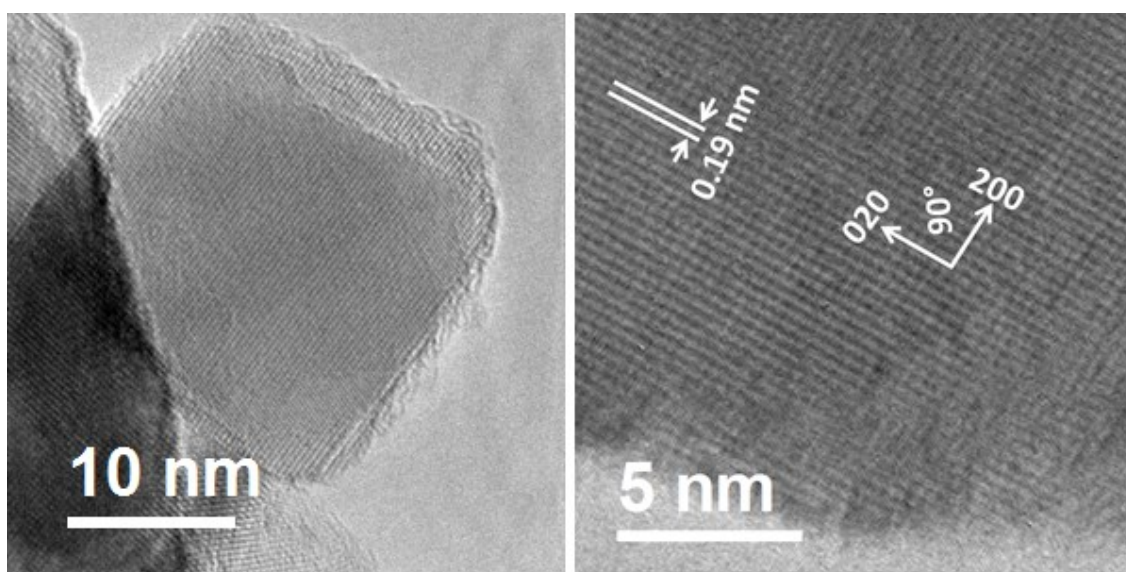

**Fig. S1** TEM and HR-TEM image of the square shaped hydrogenated TiO<sub>2</sub> particles (T-H<sub>2</sub>), viewed through [001] zone axes.

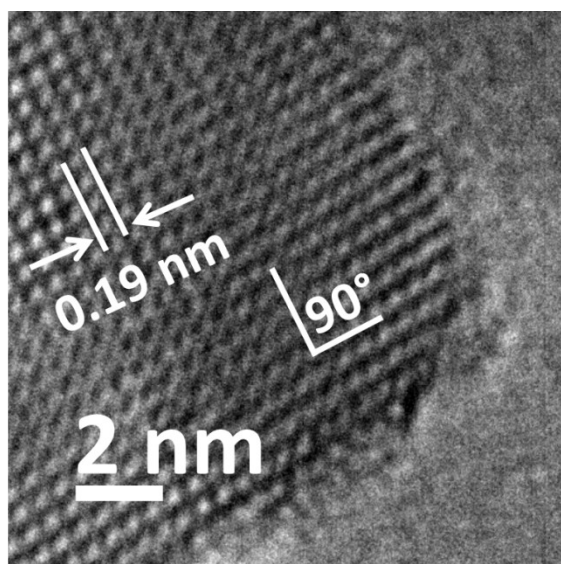

**Fig. S2** HR-TEM image of the square shaped  $\text{TiO}_2$  particles calcined at air (T-air), viewed through  $[001]$  zone axes.

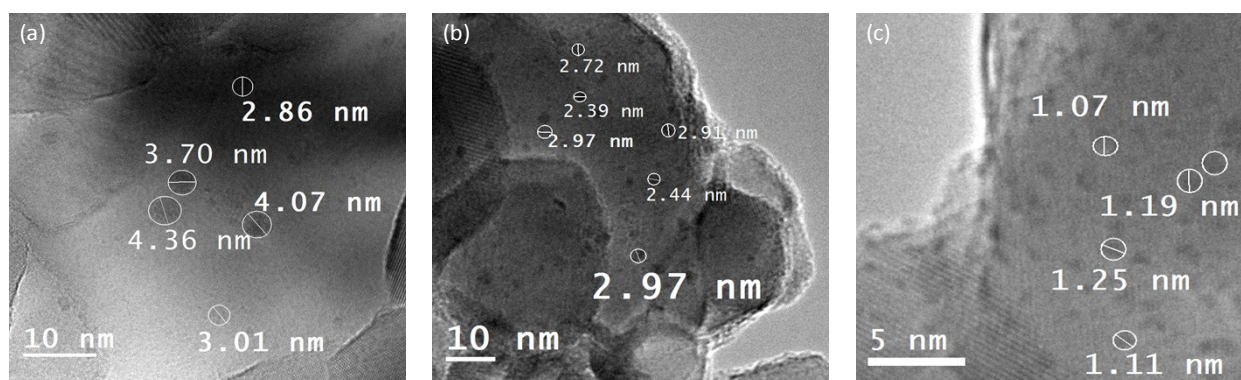

**Size of the QDs' decreases and Number of QDs increases**

**Fig. S3** HR-TEM Images of (a) HMT-0.5, (b) HMT-1, and (c) HMT-1.5 displaying size variation of the  $\text{MoS}_2$  QDs in different samples.

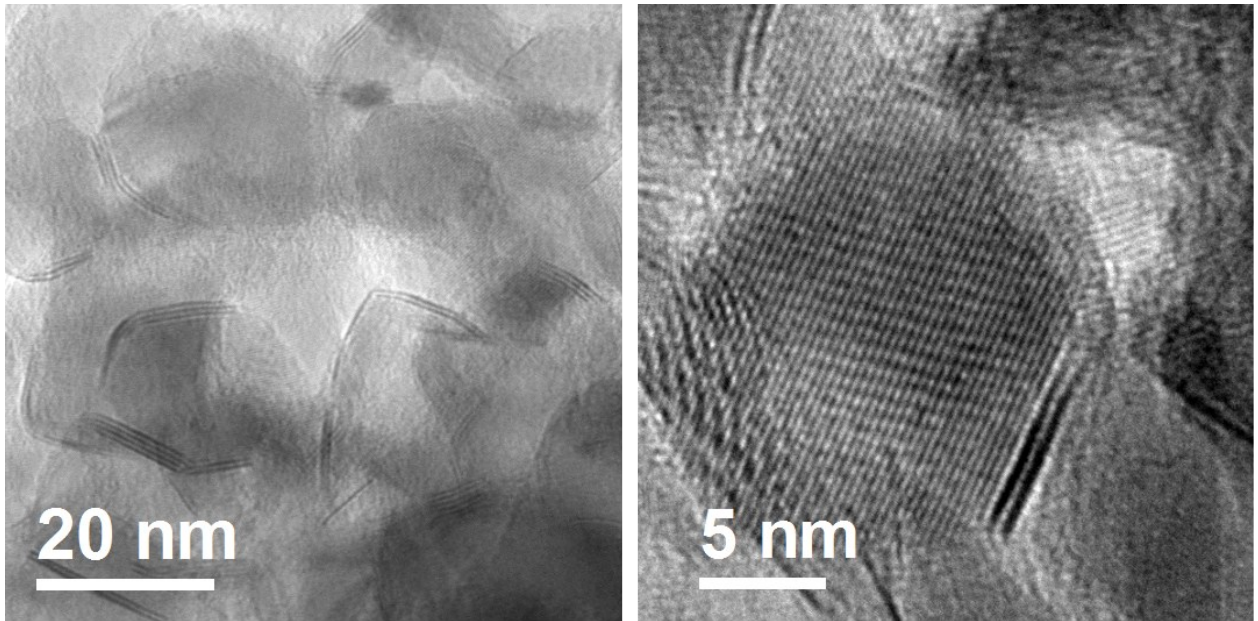

**Fig. S4** TEM and HR-TEM images of HMT-5.

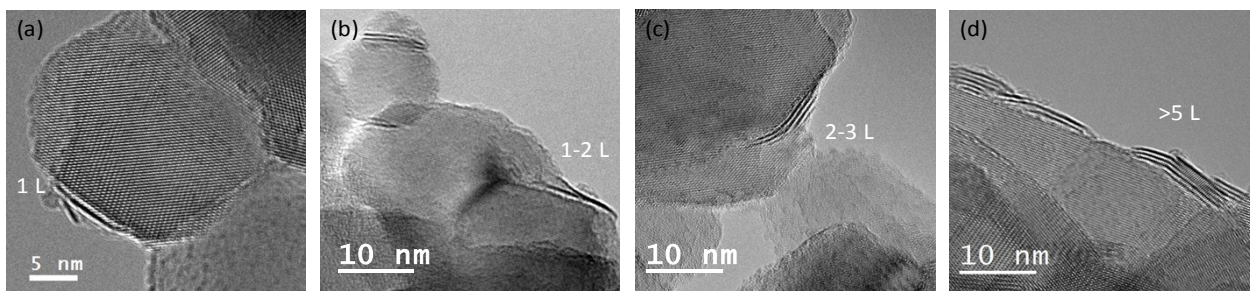

Number of layers as well as length of the sheets' increases

**Fig. S5** HR-TEM Images of (a) HMT-1.5, (b) HMT-2.5, (c) HMT-5 and (d) HMT-10 displaying size variation of the MoS<sub>2</sub> sheets in different samples.

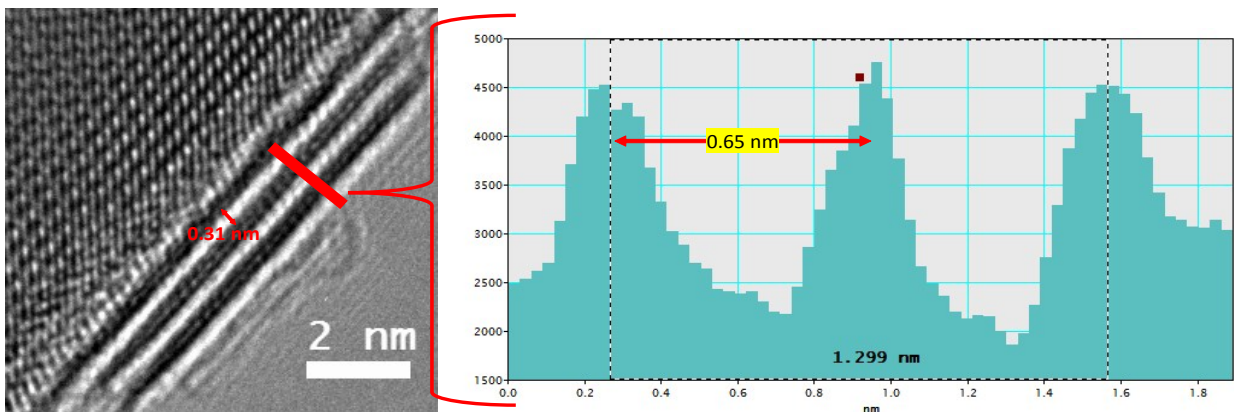

**Fig. S6** HR-TEM images of HMT-2.5 showing the 3 layers of MoS<sub>2</sub> sheet on TiO<sub>2</sub>.

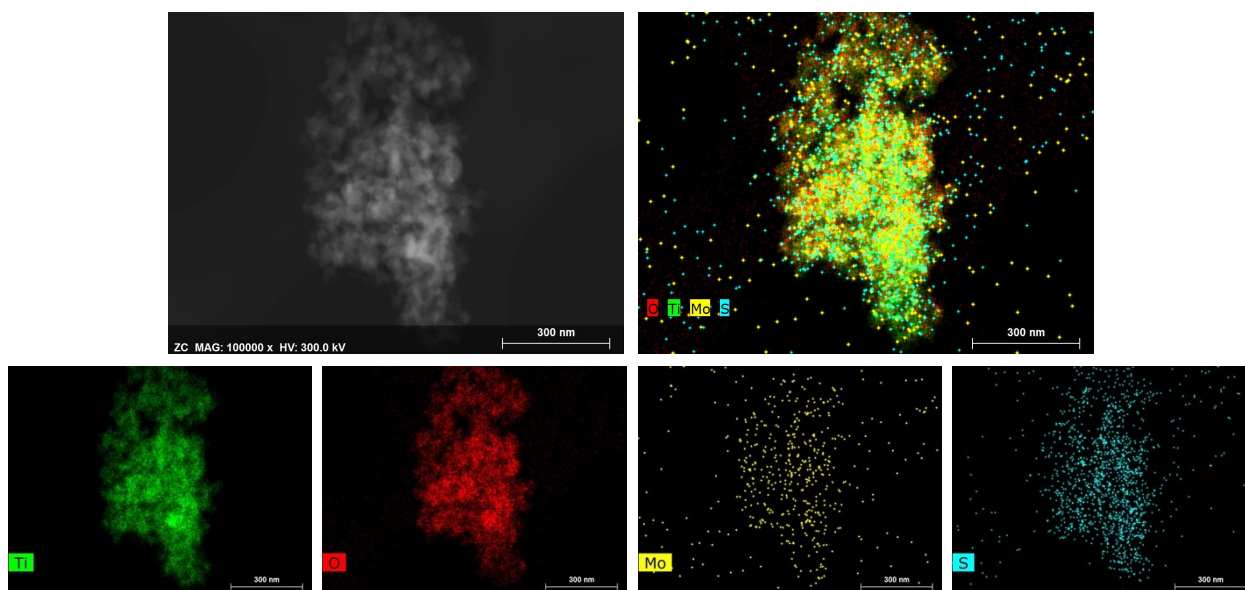

**Fig. S7** Elemental mapping analysis of HMT-1 showing the presence of Mo, S, Ti, and O.

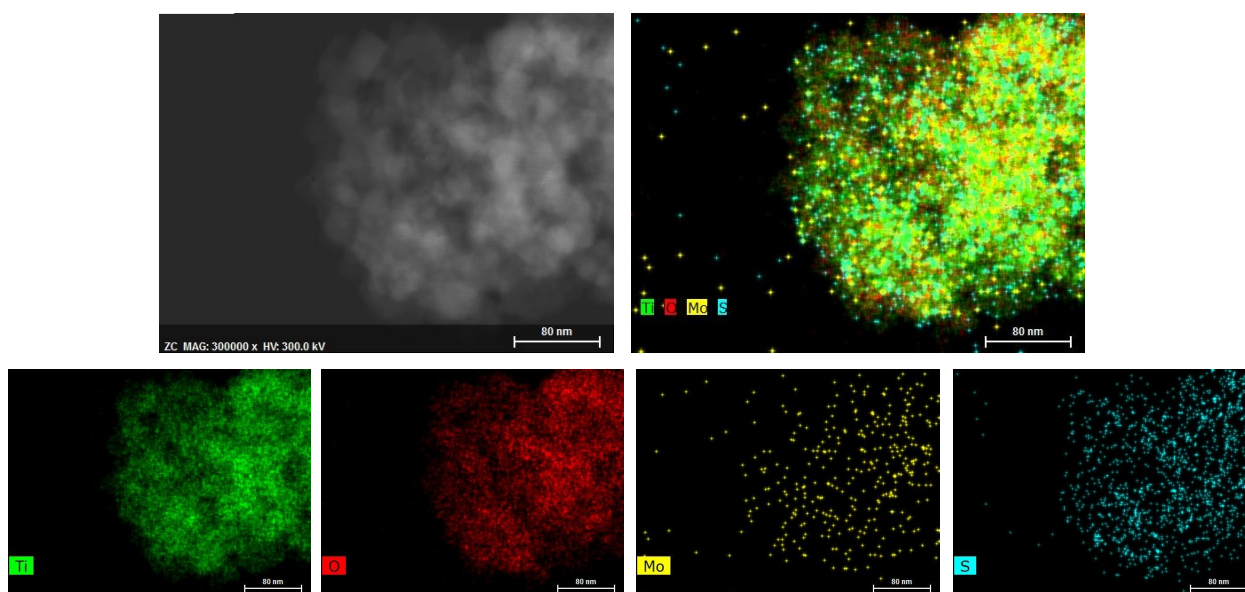

**Fig. S8** Elemental mapping analysis of HMT-1.5 showing the presence of Mo, S, Ti, and O.

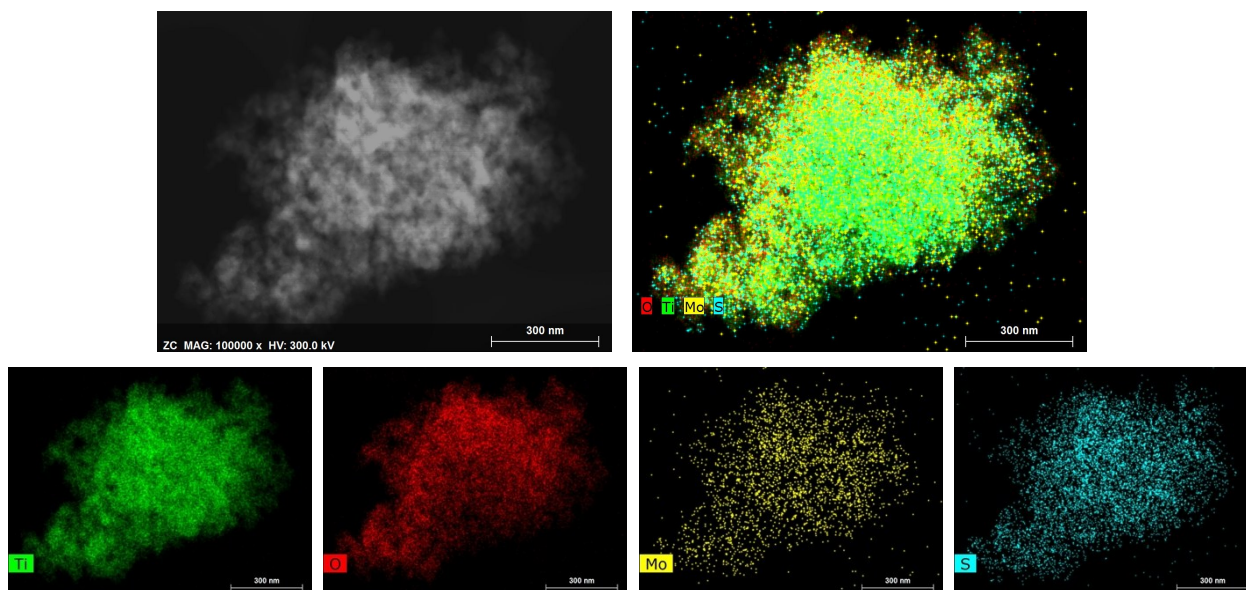

**Fig. S9** Elemental mapping analysis of HMT-2.5 showing the presence of Mo, S, Ti, and O.

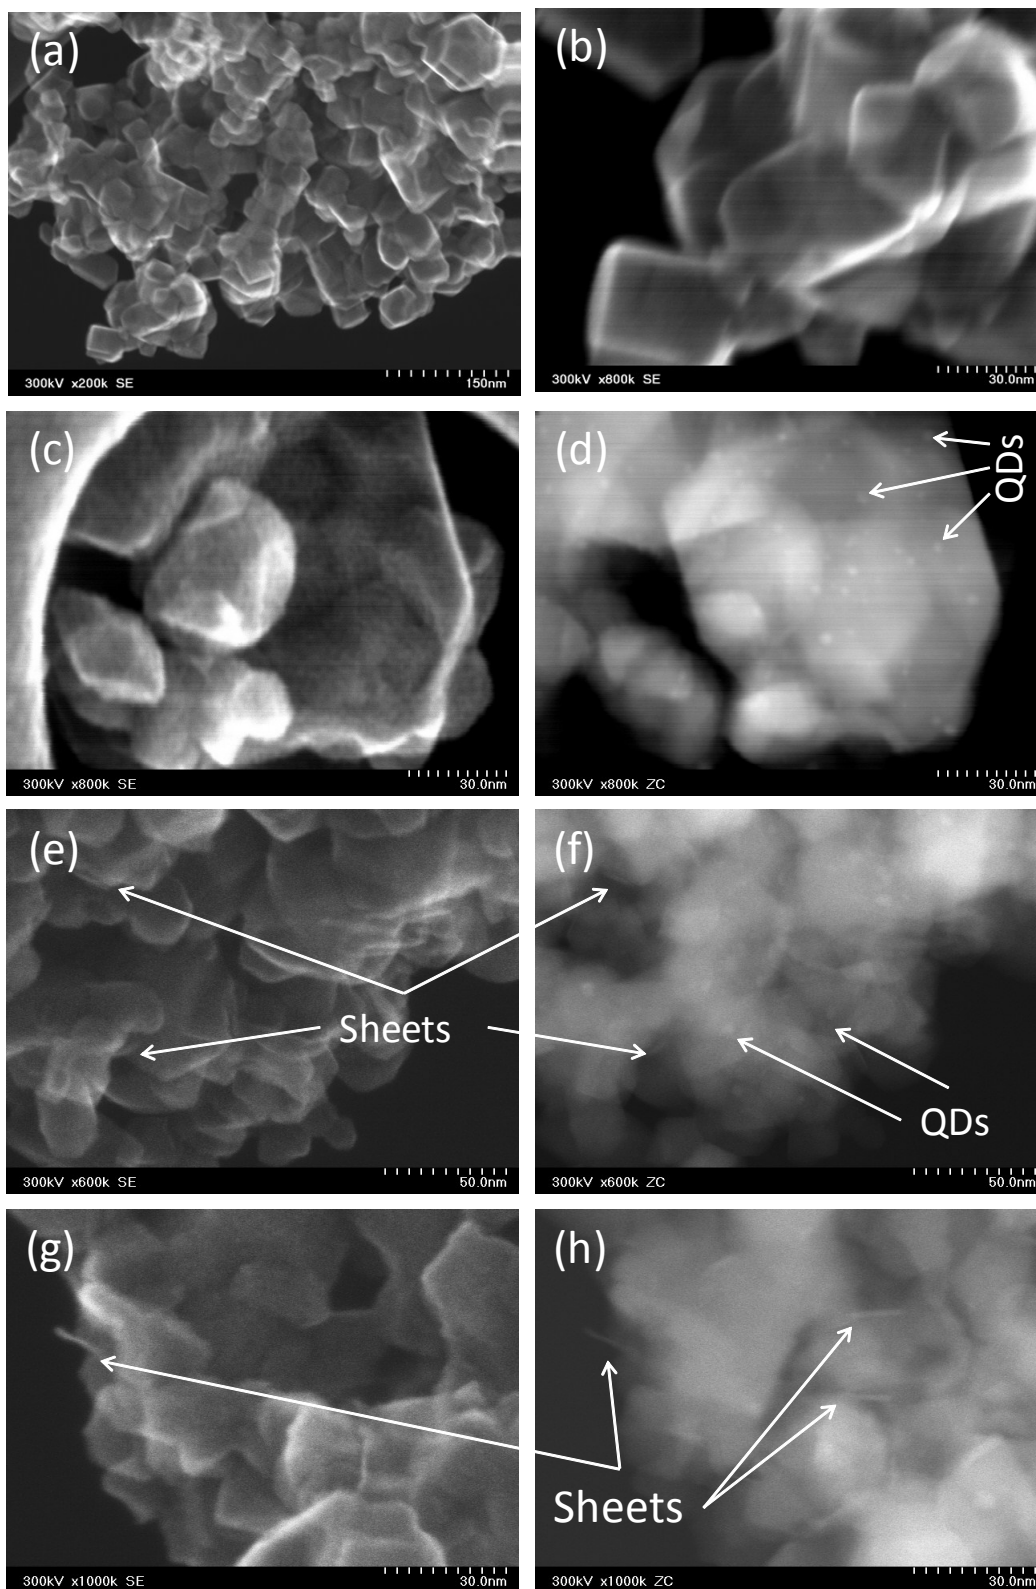

**Fig. S10** (a-b) HR-SEM images of T-H<sub>2</sub>. HR-SEM and corresponding HAADF-STEM images of (c-d) HMT-1, (e-f) HMT-1.5, (g-h) HMT-2.

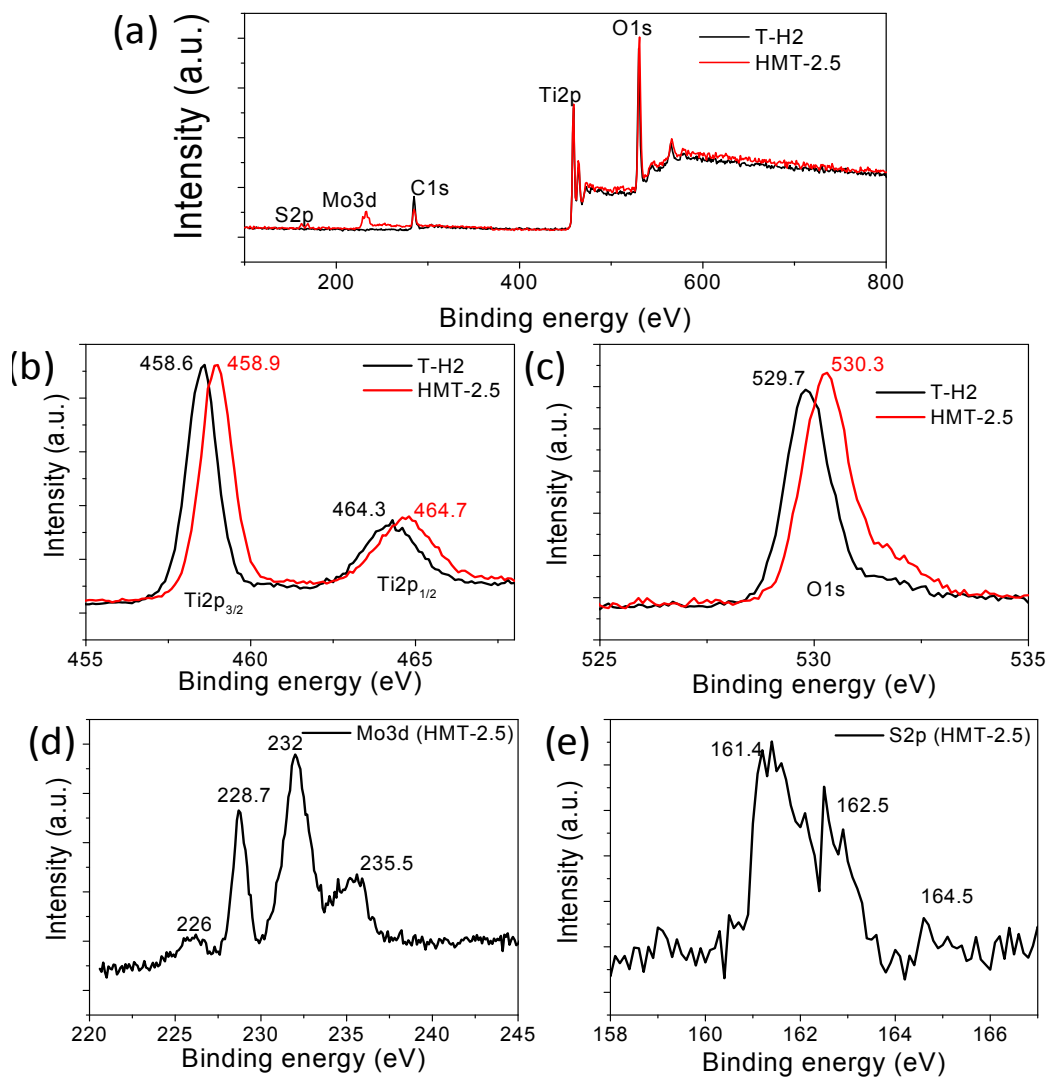

**Fig. S11** X-ray photoelectron spectra for T-H<sub>2</sub> and HMT-2.5.

**Table S1.** CHNS analysis of HMT samples

| Sample  | Before annealing |       |      |      | After annealing |       |      |      |
|---------|------------------|-------|------|------|-----------------|-------|------|------|
|         | %C               | %H    | %N   | %S   | %C              | %H    | %N   | %S   |
| HMT-0.5 | 0.10             | 1.518 | 0.00 | 0.66 | 0.10            | 0.193 | 0.00 | 0.16 |
| HMT-1   | 0.22             | 1.340 | 0.00 | 0.84 | 0.12            | 0.160 | 0.00 | 0.27 |
| HMT-1.5 | 0.22             | 1.220 | 0.00 | 1.16 | 0.18            | 0.147 | 0.00 | 0.64 |
| HMT-2   | 0.08             | 0.467 | 0.00 | 1.28 | 0.19            | 0.135 | 0.00 | 0.79 |
| HMT-2.5 | 0.09             | 0.204 | 0.00 | 1.82 | 0.08            | 0.116 | 0.00 | 1.19 |

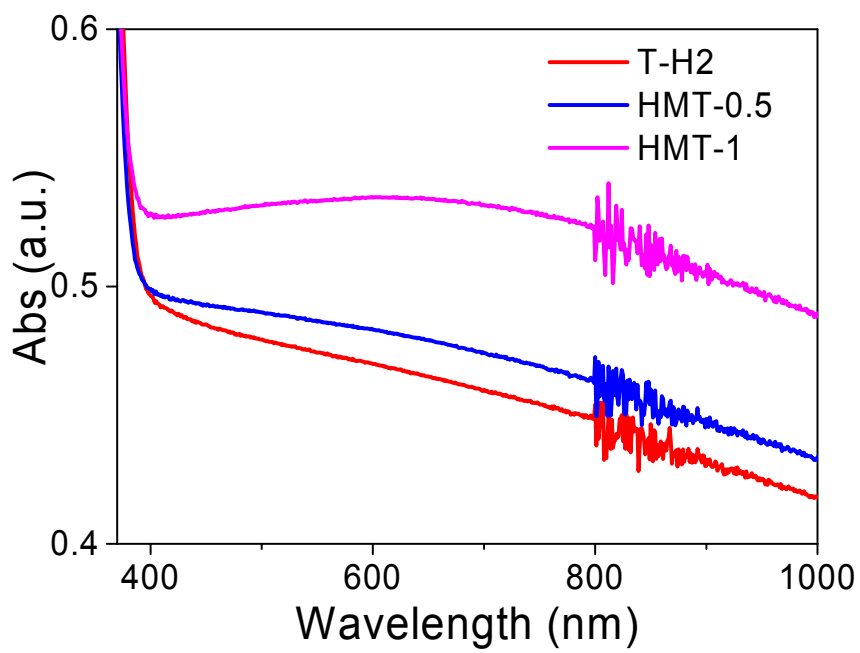

**Figure S12.** Absorption spectra of different samples.

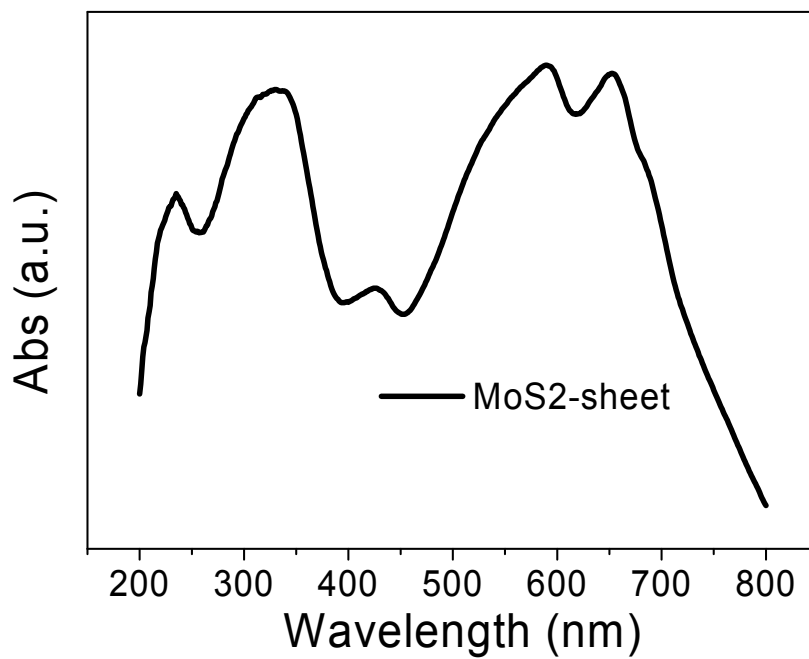

**Fig. S13** Absorption spectra of the bulk MoS<sub>2</sub> sheet.



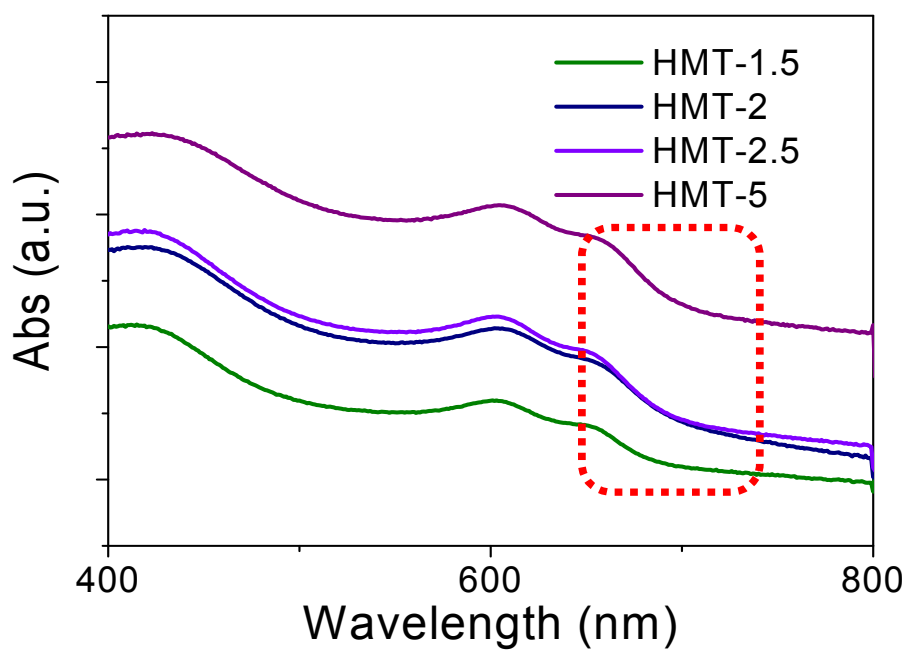

**Fig. S14** Intensity normalized absorption spectra for different HMTs. The highlighted part indicating the shifting of absorption edge.

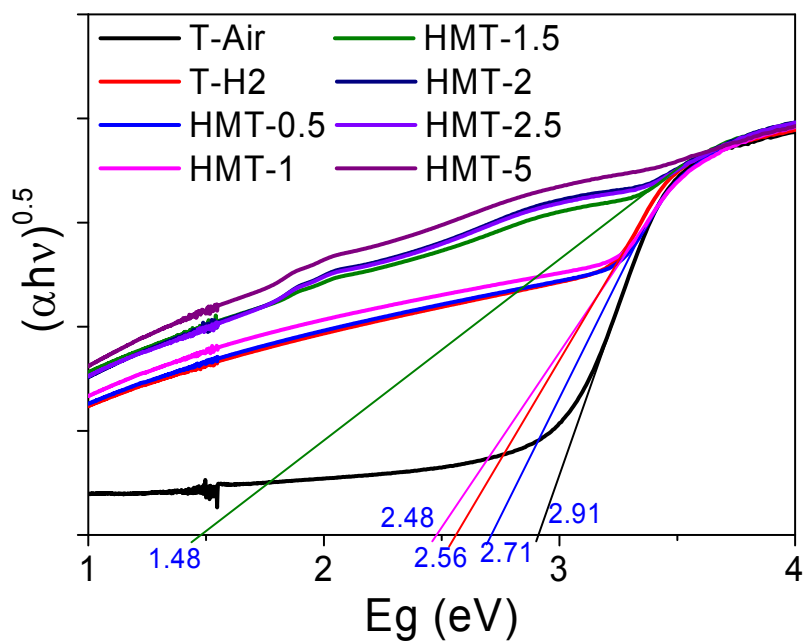

**Fig. S15** Tauc plots for different HMTs obtained from UV-VIS (Figure 3c) results.

**Table S2.** Comparison with reported activity

| Photocatalyst                                                                              | Solution                           | Light source                                                                                 | H <sub>2</sub> production rate (mmolg <sup>-1</sup> h <sup>-1</sup> ) | Reference               |
|--------------------------------------------------------------------------------------------|------------------------------------|----------------------------------------------------------------------------------------------|-----------------------------------------------------------------------|-------------------------|
| <b>MoS<sub>2</sub> - Hydrogenated / Black TiO<sub>2</sub></b>                              |                                    |                                                                                              |                                                                       |                         |
| <b>MoS<sub>2</sub> QD/<br/>hydrogenated<br/>TiO<sub>2</sub>(001)</b>                       | <b>20%<br/>methanol-<br/>water</b> | <b>1 sun, Simulated sunlight<br/>(AM 1.5G)</b>                                               | <b>3.1</b>                                                            | <b>Present<br/>work</b> |
| <b>MOS<sub>2</sub> sheet/<br/>hydrogenated<br/>TiO<sub>2</sub>(001)</b>                    | <b>20%<br/>methanol-<br/>water</b> | <b>1 sun, Simulated sunlight<br/>(AM 1.5G)</b>                                               | <b>1.5</b>                                                            | <b>Present<br/>work</b> |
| Mesoporous Black<br>TiO <sub>2</sub> /MoS <sub>2</sub> /TiO <sub>2</sub><br>Nanosheets     | 20% methanol-<br>water             | 300 W Xeon-lamp with a 420<br>nm cutoff filter.                                              | 0.56                                                                  | <b>1</b>                |
| <b>MoS<sub>2</sub> - Normal (white) TiO<sub>2</sub></b>                                    |                                    |                                                                                              |                                                                       |                         |
| 2D MoS <sub>2</sub> sheets / 2D<br>anatase (001) TiO <sub>2</sub><br>nanosheets            | 15% methanol-<br>water             | 300 W<br>Xe-arc lamp                                                                         | 2.1                                                                   | <b>2</b>                |
| MoS <sub>2</sub> -TiO <sub>2</sub> after ball-<br>milling                                  | 20% methanol-<br>water             | 300 W Xe lamp (PLS-<br>SXE300 CUV) equipped with<br>a UV optical filter (250–380<br>nm)      | 0.75                                                                  | <b>3</b>                |
| Chemically exfoliated<br>metallic MoS <sub>2</sub><br>nanosheets/TiO <sub>2</sub>          | 25% methanol-<br>water             | 300 W Xe lamp with a 400<br>nm short-wave-pass cut-off<br>filter (i.e., $\lambda < 400$ nm). | 2                                                                     | <b>4</b>                |
| Few-layered MoS <sub>2</sub><br>Nanosheets Wrapped<br>Ultrafine TiO <sub>2</sub> Nanobelts | 20% methanol-<br>water             | 1 sun                                                                                        | 0.075                                                                 | <b>5</b>                |

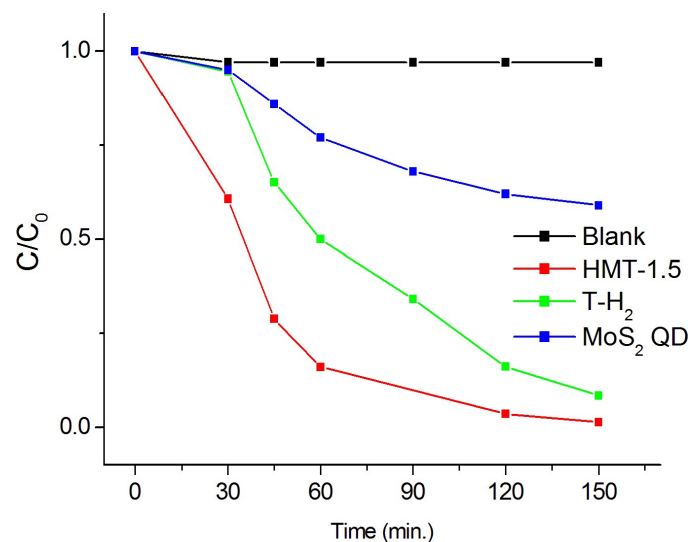

**Fig. S16** Photocatalytic degradation rate of organic dye methyl orange (MO) under sunlight over synthesized HMT-1.5, HMT-0 (T-H<sub>2</sub>) and MoS<sub>2</sub>-QD.

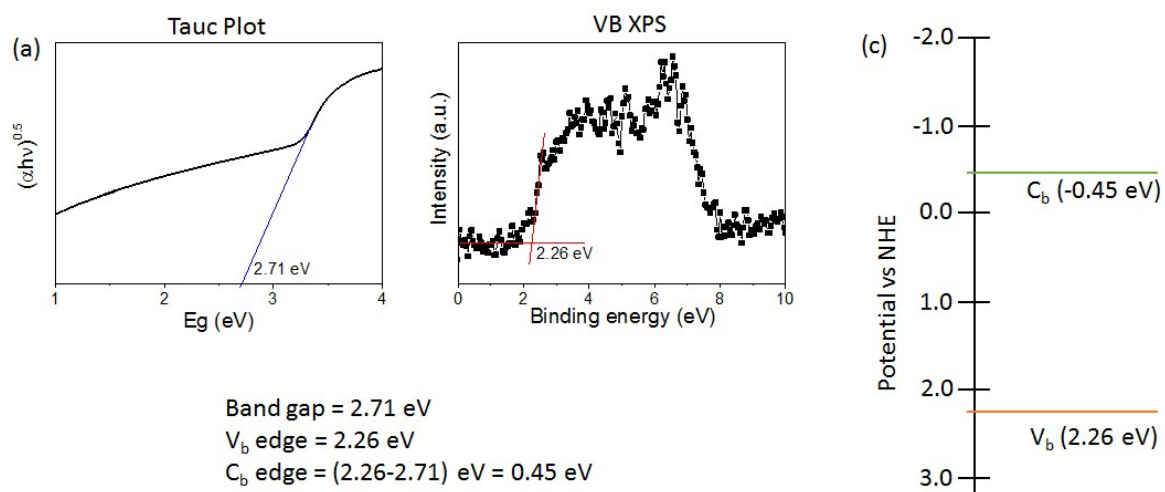

**Fig. S17** (a) Tauc plot, (b) VB XPS and (c) depicted probable band energy diagram for T-H<sub>2</sub>

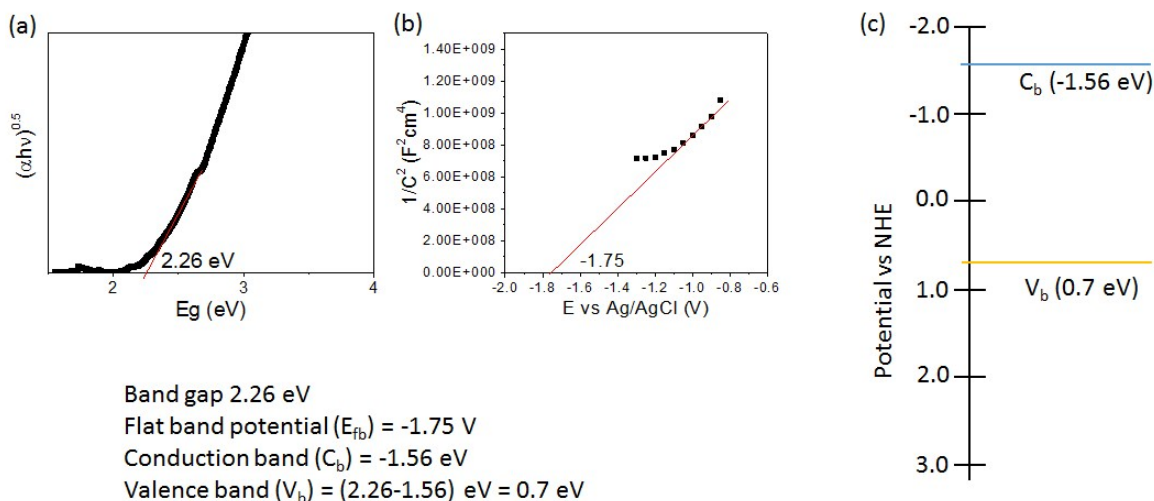

**Fig. S18** (a) Tauc plot, (b) Mott-Schottky plot obtained in 1M Na<sub>2</sub>SO<sub>4</sub> and (c) depicted probable band energy diagram for MoS<sub>2</sub>-QD

## References.

- 1 X. Liu, Z. Xing, H. Zhang, W. Wang, Y. Zhang, Z. Li, X. Wu, X. Yu and W. Zhou, *ChemSusChem*, 2016, **9**, 1118-1124.
- 2 Y.-J. Yuan, Z.-J. Ye, H.-W. Lu, B. Hu, Y.-H. Li, D.-Q. Chen, J.-S. Zhong, Z.-T. Yu and Z.-G. Zou, *ACS Catal.*, 2016, **6**, 532-541.
- 3 Y. Zhu, Q. Ling, Y. Liu, H. Wang and Y. Zhu, *Phys. Chem. Chem. Phys.*, 2015, **17**, 933-940.
- 4 S. Bai, L. Wang, X. Chen, J. Du and Y. Xiong, *Nano Res.*, 2015, **8**, 175-183.
- 5 H. Li, Y. Wang, G. Chen, Y. Sang, H. Jiang, J. He, X. Li and H. Liu, *Nanoscale*, 2016, **8**, 6101-6109.
